# Supplementary material
Source: PubMed Central journal article supplement (PMC4021478)
Supplement: supp_127.10.2351_JCS146894.pdf [file supp_127.10.2351_JCS146894.pdf]

**A** PCF

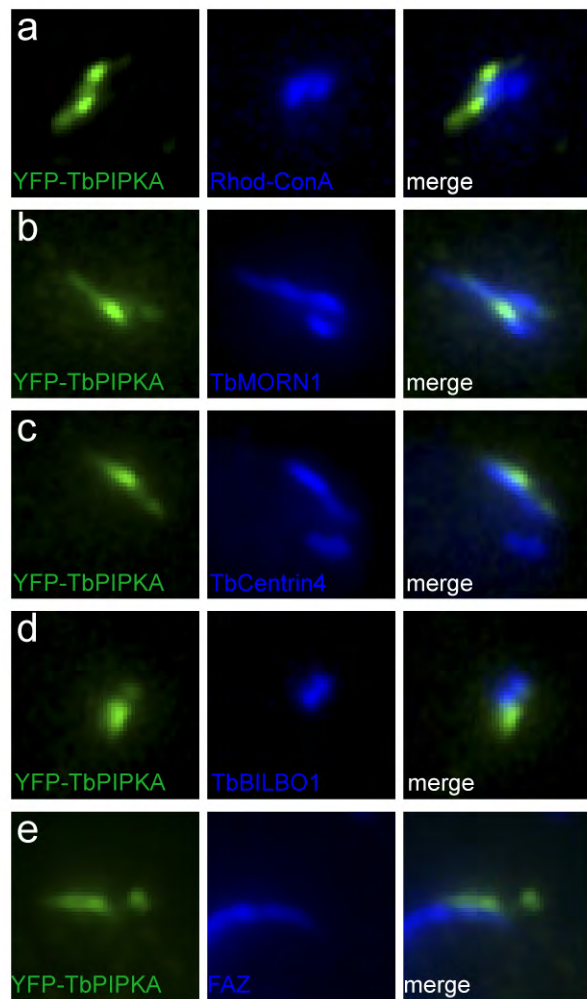

**B** BSF

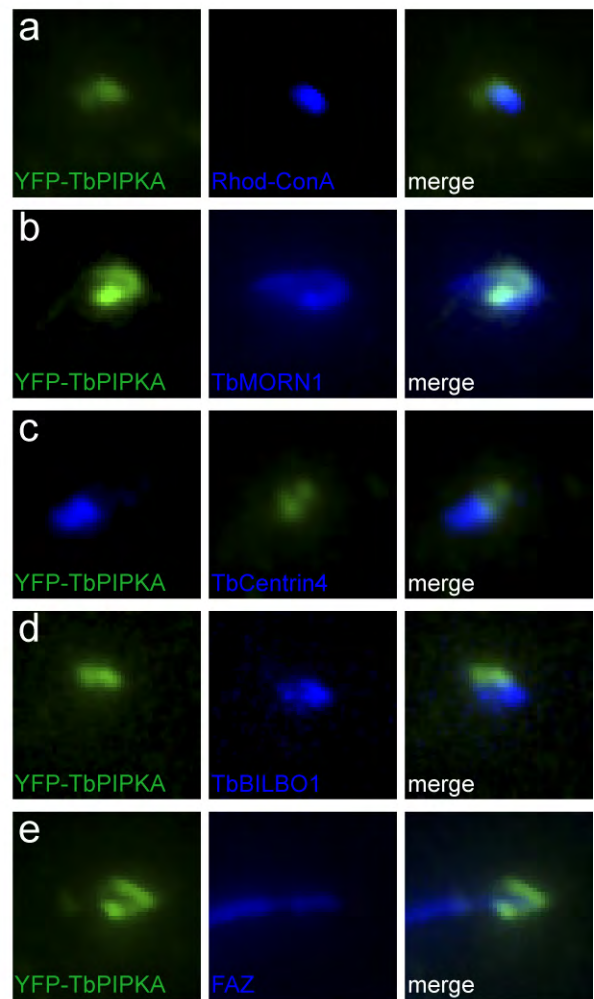

**Supplemental Fig. 1. TbPIPKA localization in PCF and BSF cells.** Higher resolution fluorescence images of Fig. 4B,C, colour-coded for YFP-TbPIPKA (green) and other markers (blue). See Fig. 4 legend for details.
